# Supplementary material for: Exploration of the synergistic regulatory mechanism of hydroxide and fluoride modification on the photocatalytic activity of 2D g-C3N4
Source: Royal Society of Chemistry journal article supplement (doi:10.1039/d4cy00971a), 2024-01-01
Supplement: d4cy00971a1.pdf [file d4cy00971a1.pdf]

## Supporting Information

### Exploration of the synergistic regulatory mechanism of hydroxide and fluoride modification on the photocatalytic activity of 2D g-C<sub>3</sub>N<sub>4</sub>

Qianqian Shang<sup>1</sup>, Hongbing Wang<sup>2</sup>, Changjie Kan<sup>1</sup>, Rui Ding<sup>2</sup>, Yankai Li<sup>2</sup>, Shiva Pandeya<sup>2,3</sup>, Ziliang Li<sup>2\*</sup>, Mahesh Kumar Joshi<sup>2,3\*</sup>

<sup>1</sup>School of Chemistry and Chemical Engineering, Liaocheng University, Liaocheng 252059, China.

<sup>2</sup>School of Materials Science and Engineering, Liaocheng University, Liaocheng 252059, China. <sup>3</sup>Central Department of Chemistry, Tribhuvan University, Kirtipur, Kathmandu, Nepal

Email: [mahesh.joshi@trc.tu.edu.np](mailto:mahesh.joshi@trc.tu.edu.np), [sdlizl1986@163.com](mailto:sdlizl1986@163.com)

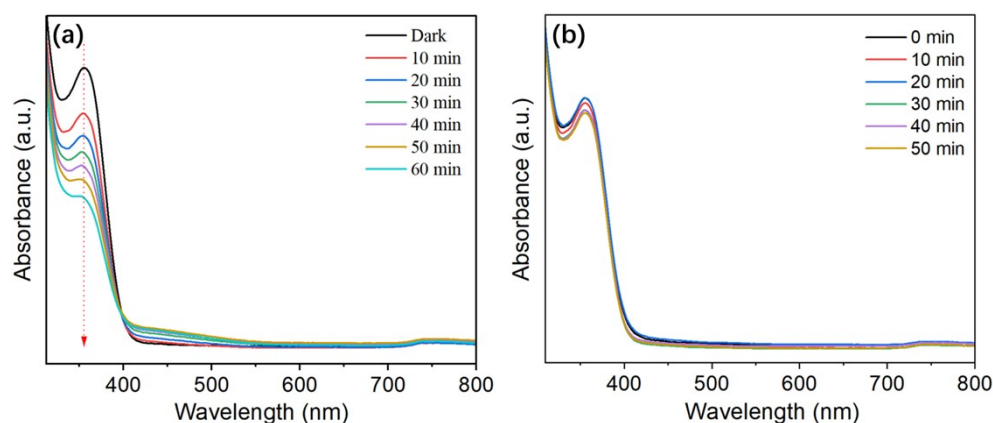

Figure S1. The UV-Vis absorbance spectra of the tetracycline (TC, 20 mg/L) degradation under light illumination (a) with and (b) without HF-CNS as photocatalyst for different time.

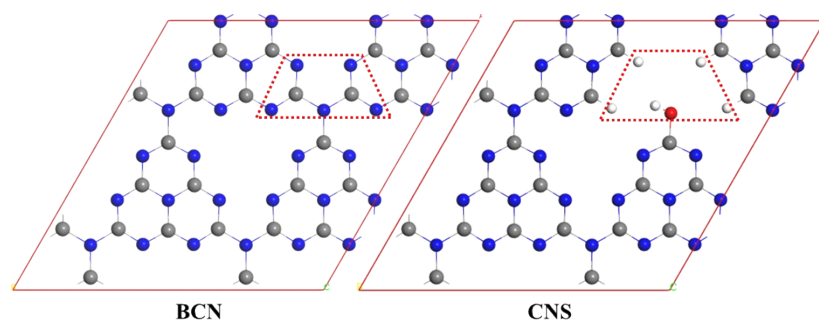

Figure S2. The initial configuration of BCN and CNS.

## Surface area and pore size distribution

Nitrogen adsorption-desorption measurements were performed to investigate the BET (Brunauer-Emmett-Teller) surface area and pore size distribution of different samples. It can be clearly seen in Figure S2 that all samples exhibit type V isotherms with H<sub>3</sub> hysteresis loops in the high relative pressure range between 0.5 and 1.0, suggesting that all the samples have mesoporous structure (1). Based on the N<sub>2</sub> adsorption-desorption curves, the BCN shows the lowest BET surface area (18.65 m<sup>2</sup>/g). However, after ethanol-thermal treatment and fluorine assisted ethanal treatment, the BET specific surface area of BCN was increased to 128.03 m<sup>2</sup>/g and 159.87 m<sup>2</sup>/g, respectively, indicating that the ethanol-thermal treatment could effectively improve the surface area of g-C<sub>3</sub>N<sub>4</sub>, especially after the HF acid assisted ethanol-thermal treatment. This tendency is consistent with the above results of SEM and HR-TEM images, supporting the morphologic structure variation of BCN, CNS and HF-CNS.

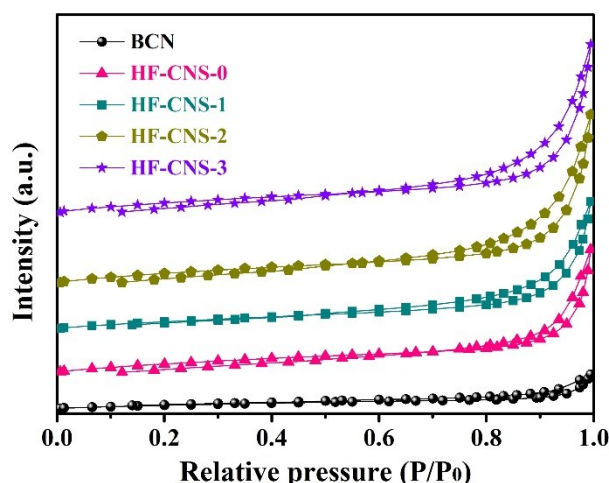

Figure S3. N<sub>2</sub> adsorption-desorption isotherm curves of the BCN, HF-CNS-0, HF-CNS-1, HF-CNS-2 and HF-CNS-3 measured at 77 K by the Brunauer-Emmett-Teller (BET) method.

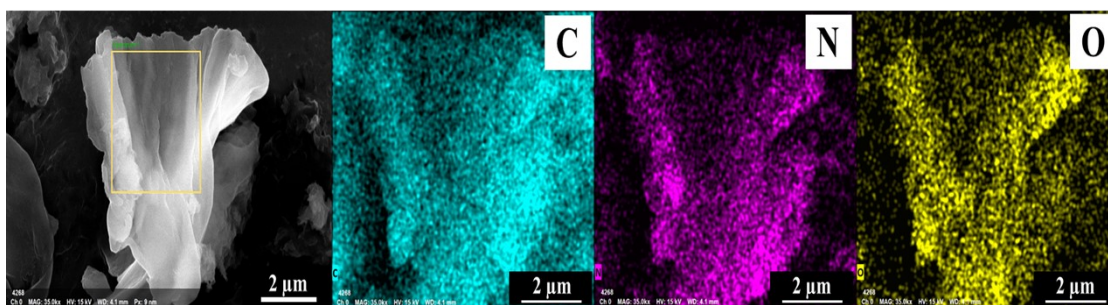

Figure S4. SEM-EDS elemental mappings of the CNS.

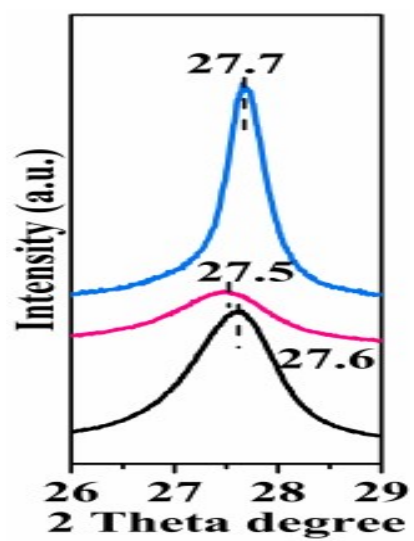

Figure S5. The magnified XRD patterns of BCN, CNS and HF-CNS-2 from 26° to 29°.

Table S1. The element composition of as-prepared catalysts (C, N, O, F atomic %) for BCN, CNS and F-CNS calculated from the XPS survey spectra.

|                 | C     | N     | O    | F    | C/N    |      |
|-----------------|-------|-------|------|------|--------|------|
| <b>BCN</b>      | 42.6  | 56.52 | 0.88 | 0    | 3/3.98 | 0.75 |
| <b>CNS</b>      | 40.35 | 56.98 | 2.67 | 0    | 3/4.23 | 0.71 |
| <b>HF-CNS-2</b> | 43.08 | 52.11 | 3.99 | 0.81 | 3/3.56 | 0.84 |

Table S2. The content ratio of function groups in the samples obtained in the high-resolution C 1s spectra.

|                 | C-OH | N-C=N |
|-----------------|------|-------|
| <b>BCN</b>      | 1.30 | 19.62 |
| <b>CNS</b>      | 6.25 | 14.51 |
| <b>HF-CNS-2</b> | 5.65 | 14.34 |

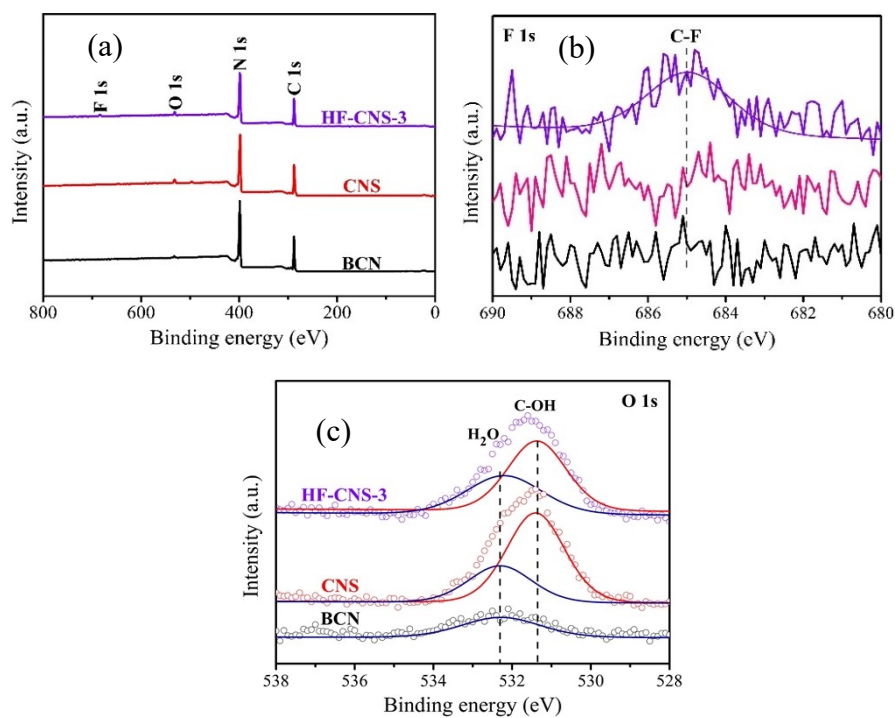

Figure S6. The XPS survey scan (a) and the high-resolution XPS of (b) F 1s and (c) O 1s spectra of BCN, CNS and F-CNS-2.

Table S3. The content ratio of function groups in the samples obtained in the high-resolution N 1s spectra.

|                 | C-N=C | N-(C) <sub>3</sub> | C-N-H | $\pi$ -excitations |
|-----------------|-------|--------------------|-------|--------------------|
| <b>BCN</b>      | 58.67 | 23.28              | 7.82  | 10.22              |
| <b>CNS</b>      | 61    | 21.47              | 6.09  | 11.45              |
| <b>HF-CNS-2</b> | 51.34 | 30.2               | 10.77 | 7.68               |

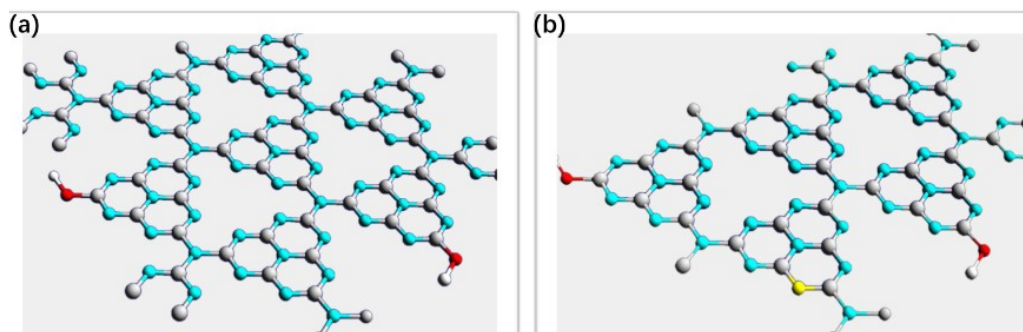

Figure S7. (a) The possible types of HF-CNS in the red dashed cycles, (b) possible types of HF-CNS-3 are shown in the red dashed cycles.

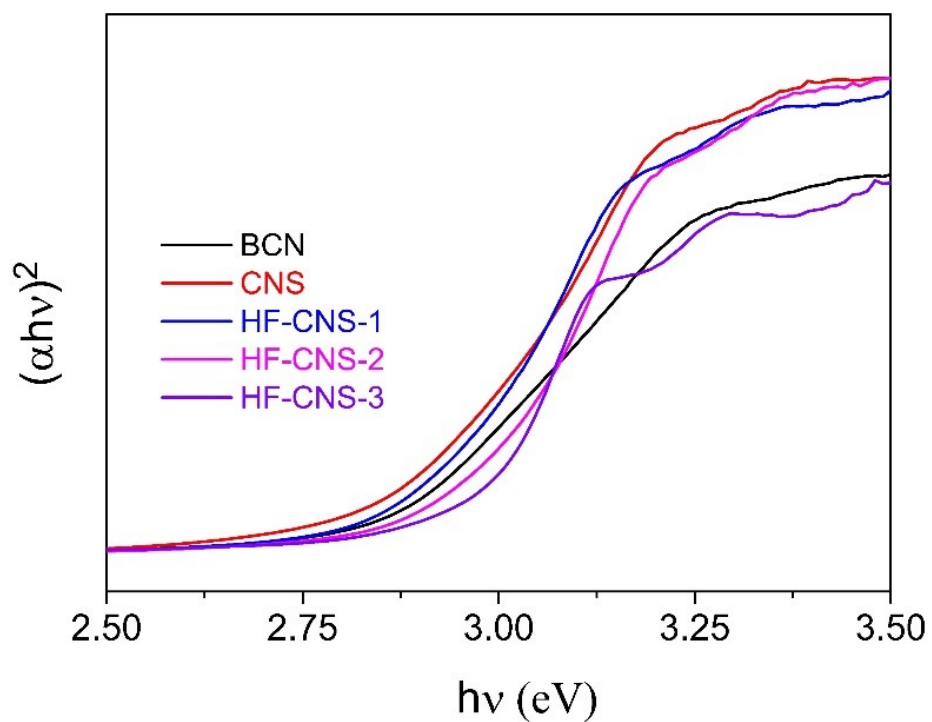

Figure S8. The band energy of the BCN, CNS and HF-CNS-X (X=1, 2, 3).

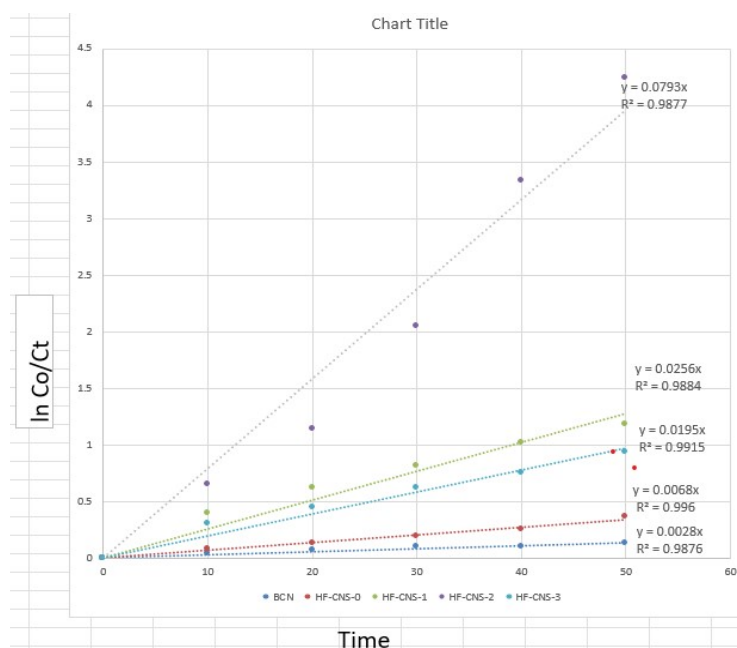

Figure S9. Pseudo-first-order curve fitting for different samples.

Table S4. A comparison of g-C<sub>3</sub>N<sub>4</sub> prepared from different precursors as photocatalysts.

| Carbon nitride                                    | Precursors                                                           | Application                     | Activity                                   | Ref.      |
|---------------------------------------------------|----------------------------------------------------------------------|---------------------------------|--------------------------------------------|-----------|
| Polymeric C <sub>3</sub> N <sub>4</sub>           | Dicyandiamide; 5-bromo-2-thiophenecarboxaldehyde; NH <sub>4</sub> Cl | H <sub>2</sub> production       | 2.448 mmol g <sup>-1</sup> h <sup>-1</sup> | (2)       |
| F-doped g-C <sub>3</sub> N <sub>4</sub>           | melamine                                                             | H <sub>2</sub> production       | 6 μmol g <sup>-1</sup> h <sup>-1</sup>     | (3)       |
| g-C <sub>3</sub> N <sub>4</sub>                   | soaking melamine in aqueous solutions                                | H <sub>2</sub> production       | 1.82 μmol g <sup>-1</sup> h <sup>-1</sup>  | (4)       |
| F-doped g-C <sub>3</sub> N <sub>4</sub>           | urea                                                                 | Photodegradation of Rhodamine B | 0.02 min <sup>-1</sup>                     | (1)       |
| Chloride-modified g-C <sub>3</sub> N <sub>4</sub> | urea                                                                 | CO <sub>2</sub> reduction       | 14 μmol g <sup>-1</sup> h <sup>-1</sup>    | (5)       |
| F-doped g-C <sub>3</sub> N <sub>4</sub>           | melamine                                                             | H <sub>2</sub> production       | 1.1 mmol h <sup>-1</sup>                   | this work |
| F-doped g-C <sub>3</sub> N <sub>4</sub>           | melamine                                                             | TC degradation                  | 0.0079 min <sup>-1</sup>                   | this work |

## References

1. Bai X, Wang X, Lu X, Jia T, Sun B, Wang C, et al. A fluorine induced enhancement of the surface polarization and crystallization of g-C<sub>3</sub>N<sub>4</sub> for an efficient charge separation. *New Journal of Chemistry*. 2021;45(21):9334-45.
2. Liu R, Liu S, Lin J, Li Y, Chen S, Wang P, et al. Donor-acceptor anchoring nanoarchitectonics in polymeric carbon nitride for rapid charge transfer and enhanced visible-light photocatalytic hydrogen evolution reaction. *Carbon*. 2022;197:378-88.
3. Zeng L, Ding X, Sun Z, Hua W, Song W, Liu S, et al. Enhancement of photocatalytic hydrogen evolution activity of g-C<sub>3</sub>N<sub>4</sub> induced by structural distortion via post-fluorination treatment. *Applied Catalysis B: Environmental*. 2018;227:276-84.
4. Barrio J, Grafmüller A, Tzadikov J, Shalom M. Halogen-hydrogen bonds: A general synthetic approach for highly photoactive carbon nitride with tunable properties. *Applied Catalysis B: Environmental*. 2018;237:681-8.
5. Li J, Zhang X, Raziq F, Wang J, Liu C, Liu Y, et al. Improved photocatalytic activities of g-C<sub>3</sub>N<sub>4</sub> nanosheets by effectively trapping holes with halogen-induced surface polarization and 2, 4-dichlorophenol decomposition mechanism. *Applied Catalysis B: Environmental*. 2017;218:60-7.
